# Supplementary material for: Teaching Biology through Statistics: Application of Statistical Methods in Genetics and Zoology Courses
Source: Atypon-hosted journal article supplement (doi:10.1187/cbe.10-11-0137), 2011-09-01
Supplement: combinedsupmats2.pdf [file combinedsupmats2.pdf]

**Ejercicio: Patrones relacionados a la morfología de murciélagos**

El objetivo de este ejercicio es analizar unos datos provistos y hacer algunos cálculos matemáticos y estadísticas para ampliar nuestro conocimiento acerca de un aspecto morfológico con implicaciones fisiológicas y socio-biológicas en el reino animal. En este ejercicio, vamos a trabajar con unas medidas del largo de la expansión de las alas (= “wingspan”) y el peso de una especie de murciélago que ocurre en Puerto Rico y otras partes del Neotrópico, conocido como el Murciélago frutero común (*Artibeus jamaicensis*), que se alimenta de frutas como las de los árboles de María y Almendros. Esta especie ocurre comúnmente en cuevas, pero también se puede encontrar debajo del follaje de palmas o árboles de mango. El murciélago frutero común es un mamífero placentado del orden Chiroptera, y familia Phyllostomidae. En Puerto Rico se observan dos épocas de reproducción al año marzo-abril y julio-agosto y las hembras típicamente dan a luz una sola cría la cuál lactan por un período de 3-4 meses. Por lo tanto, no es inusual encontrar hembras que están lactando su cría y a su vez están preñadas.

Los datos provistos en este ejercicio provienen de la investigación del Dr. Armando Rodríguez, de la Universidad Interamericana de Bayamón con respecto a wingspan y al peso de murciélagos hembras y machos de esta especie. El wingspan es la longitud horizontal entre la punta de un ala a la punta distal de la otra ala –ambas extendidas a cabalidad (ver figura abajo). La idea de este ejercicio es tratar de entender posibles asociaciones entre la estructura, el movimiento y la fisiología de un animal, utilizando como modelo, en este caso, uno de nuestros murciélagos nativos.

En la hoja de Excel adjunta encontrarán la información del wingspan y el peso de murciélagos hembras y machos de esta especie. Su misión, es analizar estos datos para contestar las siguientes preguntas:

1. ¿Qué hipotetizaría usted en cuanto al promedio del peso y del wing-span de hembras versus machos ---cuál sería mayor? ¿Hay diferencias entre los promedios del peso y el wing-span de macho versus hembras?
2. Haga una tabla que resuma las estadísticas generales: Numero de muestra (N), Promedio, Desviación Estándar, y Rango para el wing-span, y peso de (A) Todos los murciélagos, (B) los machos, y (C) las hembras.
3. ¿Son estas diferencias estadísticamente significativas? [Haga una prueba de T para determinar si las diferencias por sexo son estadísticamente significativas]
4. ¿Hay una asociación visual entre el wing-span y el peso de los murciélagos en general? (Independiente de sexo)? [haga un grafica de “Plot” en la que el wingspan sea la variable dependiente - el eje vertical (Y) y el peso la variable independiente –el eje horizontal (X) y visualice los resultados para hacer una inferencia]
5. ¿Están co-relacionadas estas dos variables? --Es decir, ¿depende una de la otra? [calcule un Pearson Correlation Coefficient]

6. ¿Qué tipo de relación es esta? – Determine la ecuación matemática que describe esta relación con mayor probabilidad. - [hacer un análisis de regresión entre estas dos variables para determinar si se relacionan de forma lineal, curvilínea, hiperbólica?]

Según sus resultados comente acerca del tamaño corporal y el wingspan de estos animales y prediga cuál es el sexo que puede cargar más peso durante el vuelo. Luego comente ¿por qué cree usted que un mecanismo como selección natural habrá favorecido la evolución de esta característica en esta dirección.

#### Referencias

Rodriguez Duran A. 2005. Murciélagos. Pp. 241-274. *En* R. L .Joglar (Editor) Biodiversidad de Puerto Rico: Vertebrados Terrestres y Ecosistemas. Editorial Instituto de Cultura Puertorriqueña. San Juan, P.R. Pp. 554 + láminas.

Gannon, M., A. Kurta, A. Rodriguez Duran and M. Willig. 2005. Bats of Perto Rico: An Island Focus and a Caribbean Perspective. University of West Indies Press. Jamaica. Pp. 235.

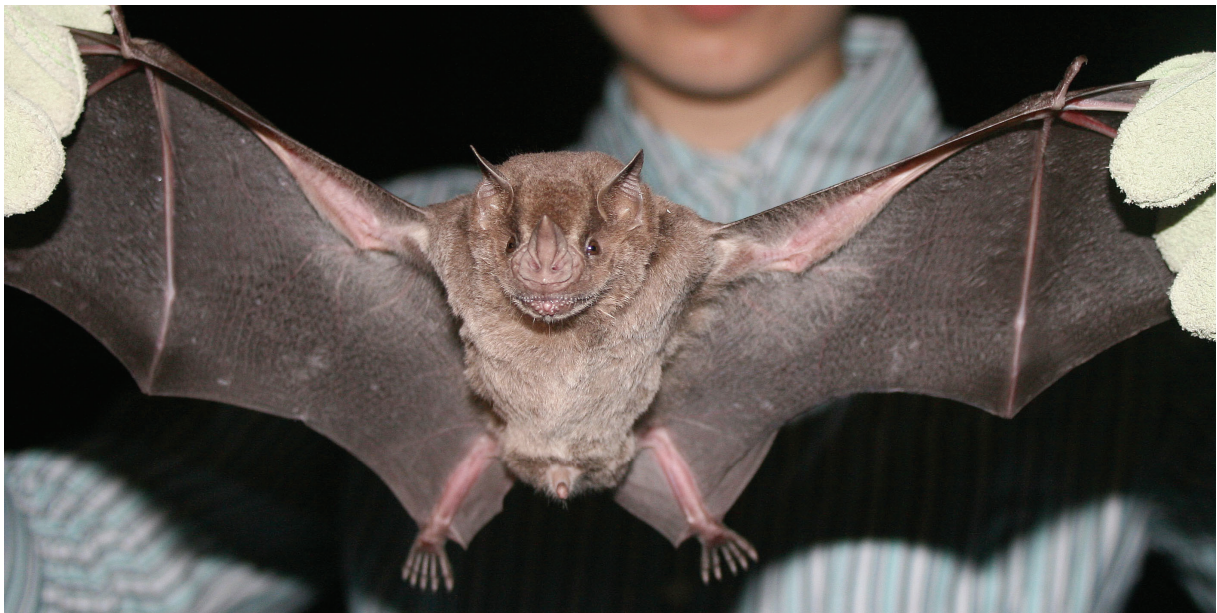

Foto: Smithsonian Tropical Institute (Panama).
