# Supplementary material for: Teaching Biology through Statistics: Application of Statistical Methods in Genetics and Zoology Courses
Source: PubMed Central journal article supplement — CBE Life Sci Educ. 2011 Fall;10(3):259–67. doi: 10.1187/cbe.10-11-0137 (PMC3164565; doi:10.1187/cbe.10-11-0137), 2011
Supplement: supp_10.3.259_CombinedSupMats1.pdf [file supp_10.3.259_CombinedSupMats1.pdf]

Universidad de Puerto Rico  
 Departamento de Biología  
 Prueba diagnóstica (pre-prueba)  
 Genética y estadística

Lee cuidadosamente las preguntas y escoge la mejor contestación. Marca tu selección en la hoja de scantron. No escribas en la hoja de examen.

1. En una bolsa hay 7 bolas rojas y dos bolas blancas. ¿Cuál es la probabilidad de que al sacar una bola de la bolsa al azar salga una blanca?
  - a. 0.11
  - b. 0.22
  - c. 0.29
  - d. 0.5
  
2. Los eventos de fecundación son independientes uno del otro. ¿Cuál es la probabilidad de que una pareja que tiene dos hijos varones tenga otro varón?
  - a. 0.5
  - b. 0.125
  - c. .875
  - d. .75
  
3. Si tienes dos variables cuantitativas y quieres evaluar la relación que existe entre ambas, ¿Qué tipo de grafica debes hacer?
  - a. "scatter plot"
  - b. "box plot"
  - c. "histogram"
  - d. "pie chart"
  
4. En un estudio de agricultura se evalúa el peso de las papas crecidas bajo diferentes condiciones. Si quieres presentar gráficamente la distribución de los pesos de las papas en una misma condición debes hacer un:
  - a. "scatter plot"
  - b. "box plot"
  - c. "histogram"
  - d. "pie chart"
  
5. Un biólogo estudia dos poblaciones de *Geospiza fortis* en las islas Galápagos. Una de las poblaciones habita en el lado norte de la isla y se alimenta de semillas grandes. La otra población habita en el lado sur de la isla y se alimenta de semillas más pequeñas.

| Población             | Tamaño del pico en cm (número de muestras) |
|-----------------------|--------------------------------------------|
| Lado Norte de la Isla | 1.12 ± 0.06 (34)                           |
| Lado Sur de la Isla   | 1.05 ± 0.02 (41)                           |

$p$  value para la diferencia entre los promedios = .06

¿Basado en estos datos podrías decir que las diferencias son significativas?

- a. Si
  - b. No
6. En una bolsa hay 7 bolas rojas y dos bolas blancas. ¿Cuál es la probabilidad de que al sacar dos bolas ambas sean blancas?
    - a. .0242
    - b. .0275
    - c. .0121
    - d. .0484

Preguntas 7 y 8. En la especie *Pisum sativum* las plantas pueden ser altas (*Ee* o *EE*) o enanas (*ee*). Las semillas pueden ser amarillas (*Vv* o *VV*) o verdes (*vv*). En el momento de la fecundación cada organismo provee una copia de cada gen que controla cada característica. Por ejemplo un organismo *Ee* puede proveer gametos *E* o gametos *e* con la misma frecuencia.

7. ¿Cómo sería la combinación de alelos generados por un organismo *EeVv*?
- a. *Ee* y *Vv*                      b. *EV*, *Ev*, *eV* y *ev*                      c. *EV* y *ev*                      d. *E*, *V*, *e*, *v*
8. Si los gametos de un organismo *EeVv* se fecundan con los de un organismo *eevv*. ¿Qué porcentaje de la progenie será *EeVv*?
- A. 100%                      B. 75%                      C. 50%                      D. 25%                      E. no se puede determinar
9. La sangre puede ser clasificada como tipo M, tipo N y tipo MN. Los individuos M tiene dos copias del alelo M, los individuos N tienen dos copias del alelo N y los que son MN tienen un alelo M y un alelo N. La frecuencia de estos alelos en una población está dada por la siguiente relación:  $1 = p^2 + 2pq + q^2$ . Donde p es la frecuencia del alelo M y q esta frecuencia del alelo N.

De acuerdo a la siguiente tabla la frecuencia del alelo M en la población de América Central es \_\_\_\_\_.

| Grupo             | Tipo de sangre M, N, MN |    |        | Tamaño de la muestra |
|-------------------|-------------------------|----|--------|----------------------|
|                   | M (MM)                  | MN | N (NN) |                      |
| América Central   | 53                      | 29 | 4      | 86                   |
| América del Norte | 78                      | 61 | 139    | 278                  |

- a. 0.616                      c. 0.379
- b. 0.785                      d. 0.383
10. Utilizando los datos de la tabla anterior determina cuál de las siguientes es una buena interpretación de los resultados.
- a. La frecuencia de individuos con tipo de sangre MN es mayor en América del Norte que en América Central.
- b. La frecuencia de individuos con tipo de sangre MN es mayor en América Central que en América del Norte.
- c. La frecuencia del tipo de sangre M es mayor en América del Norte que en América Central.
- d. El tipo de sangre MN es una característica controlada por el ambiente.

11. Observa las siguientes graficas y escoge la respuesta que mejor describe los datos ilustrados.

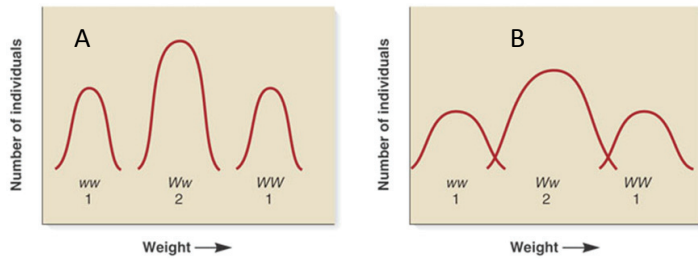

- Los genotipos del panel A pesan mucho menos que los genotipos del panel B.
- Existe mucha más variabilidad entre los genotipos en A.
- Si los genotipos en A y B son iguales, las diferencias observadas entre A y B puede estar dadas por situaciones ambientales diferentes.
- El promedio en cada uno de los genotipos en cada panel es similar, solo varía la desviación en cada uno de ellos.

12. De acuerdo a los siguientes datos la covarianza entre X y Y es de 152.6. Esto significa que el coeficiente de correlación es 0.237. Este coeficiente de correlación indica que:

| Peso en Kg de la madre (X) | Peso en Kg del padre (z) | Peso en kilogramos de la progenie (Y) |
|----------------------------|--------------------------|---------------------------------------|
| 570                        | 699                      | 568                                   |
| 572                        | 678                      | 560                                   |
| 599                        | 698                      | 642                                   |
| 602                        | 697                      | 580                                   |
| 631                        | 655                      | 586                                   |
| 603                        | 657                      | 642                                   |
| 599                        | 678                      | 632                                   |
| 625                        | 689                      | 580                                   |
| 584                        | 699                      | 605                                   |
| 575                        | 679                      | 585                                   |
| promedio=596               | promedio=682.9           | promedio=598                          |
| SDx=21.1                   | SDz=16.6                 | SDy=30.5                              |

- Mientras más pesa la madre y el padre, mas pesa la progenie.
- Mientras más pesa el padre, menos pesa la progenie.
- Mientras más pesa el padre, mas pesa la progenie.
- No hay relación entre el peso de la madre y la progenie.
- Mientras más pesa la madre, mas pesa la progenie.

Prueba diagnóstica (Post nov 2009)  
Genética y estadística

Lee cuidadosamente las preguntas y escoge la mejor contestación. Marca tu selección en la hoja de scantron. NO escribas en la hoja de examen.

13. Para hacer una reacción de polimerización *in vitro* utilizas una mezcla de nucleótidos que contiene 60% adeninas, 20% glicinas, 10% citosinas y 10% timinas, ¿Cuál es la probabilidad de que se sintetice un triplete de adenina-citosina-timina?

- e. 0.6                                      f. 0.006                                      g. .06                                      h. .1

14. Para establecer la relación entre el fenotipo de peso de la fruta y el fenotipo de altura de la planta en la muestra ilustrada en la tabla puedes hacer \_\_\_\_\_.

- a. un histograma  
b. un "stem and leaf plot"  
c. un "scatter plot"  
d. un "pie chart"

| altura de la planta(cm) | peso de la fruta(Kg) |
|-------------------------|----------------------|
| 159                     | 48                   |
| 162                     | 50                   |
| 161                     | 52                   |
| 175                     | 60                   |
| 174                     | 64                   |
| 198                     | 81                   |
| 172                     | 58                   |
| 180                     | 74                   |
| 161                     | 50                   |
| 173                     | 54                   |

15. Al analizar los datos en la tabla anterior se obtiene un  $R=0.89$ . Los datos sugieren que...

- a. No hay relación entre altura y peso.  
b. Se espera que mientras mayor sea la altura de la planta, mas pesa el fruto.  
c. La influencia ambiental determina la relación entre altura de la planta y peso de la fruta.  
d. La relación entre altura de la planta y peso de la fruta es inversamente proporcional.

16. Al hacer el siguiente cruce de dos cepas di-híbridas de *Pisum sativum* se espera una razón fenotípica de 9:3:3:1 en la F2.

| cruce parental                                      | generacion F1                  | generacion F2                                                                                 |
|-----------------------------------------------------|--------------------------------|-----------------------------------------------------------------------------------------------|
| semilla lisa, amarilla x semillas arrugadas, verdes | 100% semillas lisas, amarillas | 315 lisas, amarillas<br>108 lisas, verdes<br>101 arrugadas, amarillas<br>32 arrugadas, verdes |

Al hacer el análisis de la chi-cuadrada encuentras que las diferencias entre los datos observados y los esperados para F2 NO son significativas. Si el valor critico es .05, entonces esperas que...

- a. En este caso  $p > 0.05$   
b. En este caso  $p < 0.05$   
c. Las diferencias entre lo observado y lo esperado reflejan un fenómeno biológico.  
d. a y c son correctas.  
e. b y c son correctas.

Preguntas 5 y 6. En la especie *Pisum sativum* las plantas pueden ser altas (*Ee* o *EE*) o enanas (*ee*). Las semillas pueden ser amarillas (*Vv* o *VV*) o verdes (*vv*). En el momento de la fecundación cada organismo provee una copia de cada gen que controla cada característica. Por ejemplo un organismo *Ee* puede proveer gametos *E* o gametos *e* con la misma frecuencia.

17. ¿Cómo sería la combinación de alelos generados por un organismo *EeVv*?

- e. *Ee* y *Vv*                      f. *EV*, *Ev*, *eV* y *ev*                      g. *EV* y *ev*                      h. *E*, *V*, *e*, *v*

18. Si los gametos de un organismo *EeVv* se fecundan con los de un organismo *eevv*. ¿Qué porcentaje de la progenie será *EeVv*?

- A. 100%                      B. 75%                      C. 50%                      D. 25%                      E. no se puede determinar

19. Un biólogo estudia las frecuencias fenotípicas de los tipos de sangre en dos poblaciones judías.

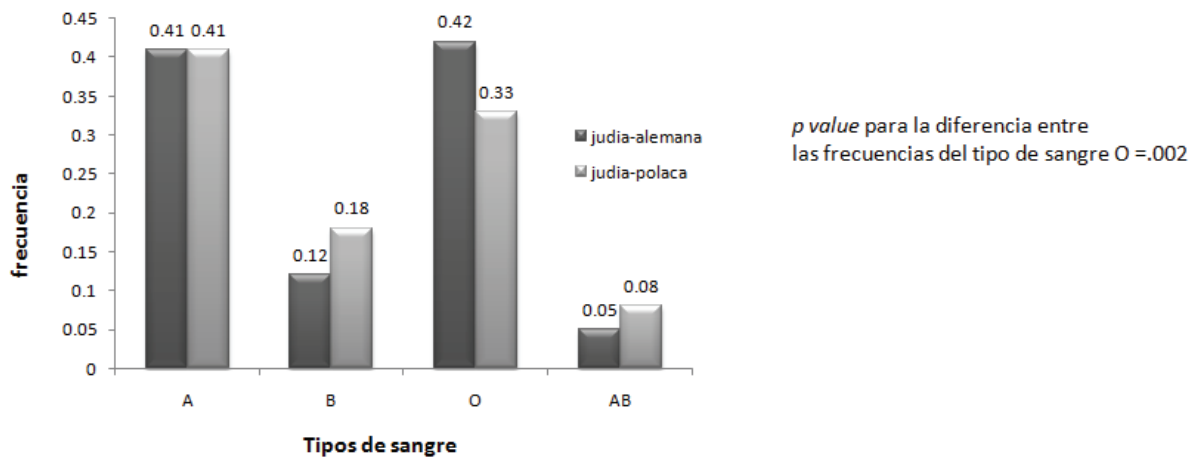

¿Basado en estos datos podrías decir que las diferencias en la frecuencia de tipo de sangre O son significativas?

- c. El valor *p* indica que las diferencias son significativas.  
d. La grafica indica que las diferencias NO son significativas.  
e. El valor *p* indica que las diferencias NO son significativas.  
f. a y b son correctas.  
g. b y c son correctas.

20. Utilizando los datos de la figura anterior determina cuál de las siguientes es una buena interpretación de los resultados.

- e. El alelo  $I^A$  y el alelo  $i$  (O) son igualmente frecuentes en la población judía-alemana.  
f. El alelo  $i$  (O) es más frecuente que alelo  $I^B$  en la población judía-alemana.  
g. El alelo  $i$  (O) es más frecuente que alelo  $I^A$  en la población judía-alemana.  
h. b y c son posibles.

21. Observa las siguientes graficas y escoge la respuesta que mejor describe los datos ilustrados.



- e. Existe mucha más variabilidad entre los genotipos en A.
- f. Los genotipos del panel A pesan mucho menos que los genotipos del panel B.
- g. La frecuencia de individuos heterocigóticos es mayor en B que en A.
- h. Si los genotipos en A y B son iguales, las diferencias observadas entre A y B pueden deberse a situaciones ambientales diferentes.

22. En una bolsa hay 7 bolas rojas y dos bolas blancas. ¿Cuál es la probabilidad de que al sacar una bola de la bolsa al azar salga una blanca?

- e. 0.11
- f. 0.22
- g. 0.29
- h. 0.5

23. La sangre puede ser clasificada como tipo M, tipo N y tipo MN. Los individuos M tiene dos copias del alelo M, los individuos N tienen dos copias del alelo N y los que son MN tienen un alelo M y un alelo N. La frecuencia de estos alelos en una población está dada por la siguiente relación:  $1 = p^2 + 2pq + q^2$ . Donde p es la frecuencia del alelo M y q es la frecuencia del alelo N.

De acuerdo a la siguiente tabla la frecuencia del alelo M en la población de América Central es \_\_\_\_\_.

| Grupo             | Tipo de sangre M, N, MN |    |        | Tamaño de la muestra |
|-------------------|-------------------------|----|--------|----------------------|
|                   | M (MM)                  | MN | N (NN) |                      |
| América Central   | 53                      | 29 | 4      | 86                   |
| América del Norte | 78                      | 61 | 139    | 278                  |

- e. 0.616
- f. 0.785
- g. 0.379
- h. 0.383

24. Un hombre normal, heterocigótico para el rasgo de anemia falciforme se casa con una mujer normal heterocigótica. ¿Cuál es la probabilidad de que si tienen dos hijos, los dos sean afectados o los dos sean normales?

- a. .0625
- b. .5625
- c. .035
- d. .625
